# Supplementary material for: Feline Demodicosis Case Report—First Molecular Characterization of Demodex Mites in Romania
Source: MDPI journal article supplement (doi:10.3390/pathogens10111474), 2021-11-12

File: 260\_P2\_DEMODEX\_F.ab1 Run Ended: 2020/3/11 2:3:44 Signal G:283 A:475 C:271 T:580  
Sample: 260\_P2\_DEMODEX\_F Lane: 69 Base spacing: 12.844023 825 bases in 9804 scans Page 1 of 2

10 20 30 40 50 60 70 80 90 100 110 120  
TT TT CATTT GG A CTT GTAT GAGGGG ATTAATGAAGATTTTTTATGAATGTTTTAATTGGTGAATTTAATTTTTCCATGAAAAATTGGAATTATTTCTAAAGACGAGAAGACCCCGAAATCTTTAT

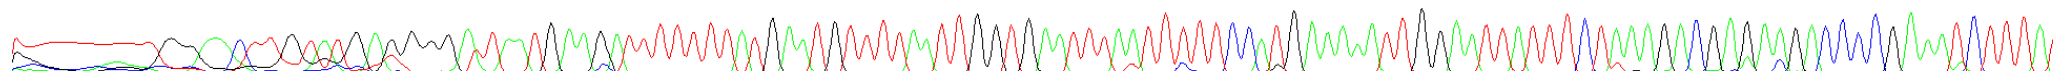

130 140 150 160 170 180 190 200 210 220 230 240 250  
TTTAGAAAAAGGTATTTTAATTTTTATTTGGGGGAAAGTTTTATTTTTATTTTTATTTATGAGGAACCTTTATGAAGGTTGATTGGATAGATACCTTCGGGGTTAACAGGATTATTTTTCTT

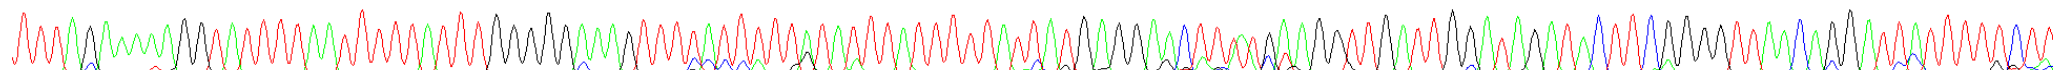

260 270 280 290 300 310 320 330 340 350 360 370  
TGAAGTTCTTATTTTTGGGGAGAGATTATTACCTCGATGTTGGCTTAAGAACGGACGGGCGTGGTCACAGGACAGCAACCCACGCAATGTGC GTTGA GATTTCATAT TATATAC GAAAAATCTGATCG

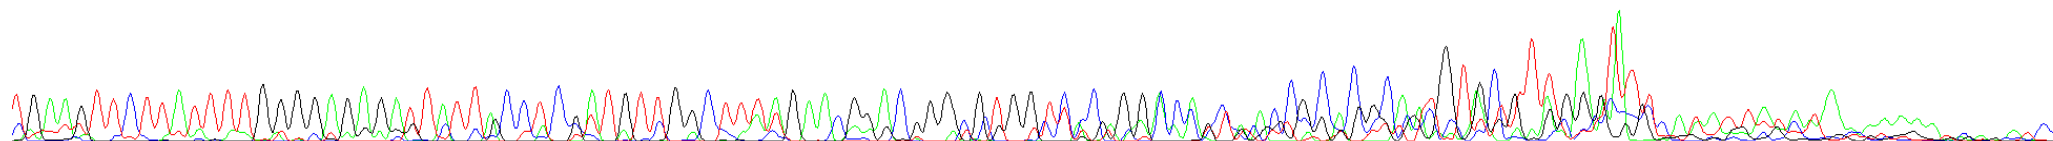

380 390 400 410 420 430 440 450 460 470 480 490 500  
CTGCTACTGAGAAA GCCCTAGTCCCGACAAATATAGCCGTAGTGATGTTTATATTCTGACTCACAGACTCGCGCTCCTCAAGCTAAACCA TCACGCAGTAGCGTTCAAGG TAGGGCGCTAGGAGA

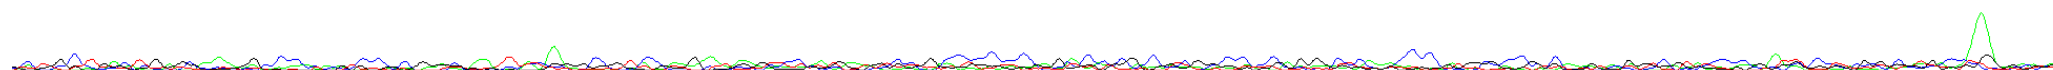

510 520 530 540 550 560 570 580 590 600 610 620 630  
GAGAAGATCTGCATCATGTAGGCACTACAGTAGGCATATGATGCGAGTGACGTGATATGGTCATGATGATTGCGGTACATTTGGTAGAGGGTGA TGTTTAGACATGTCTACTTACGATATGAGAT

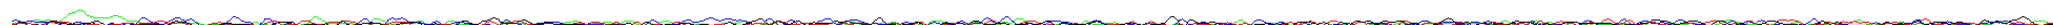

File: 260\_P2\_DEMODEX\_F.ab1

Run Ended: 2020/3/11 2:3:44

Signal G:283 A:475 C:271 T:580

Sample: 260\_P2\_DEMODEX\_F

Lane: 69

Base spacing: 12.844023

825 bases in 9804 scans

Page 2 of 2

640 650 660 670 680 690 700 710 720 730 740 750  
T A A A A T G T C G A A T G C T A T T T A A T T G G C A G G A A A A G T T G G T T T A T G G T C G T T A G C A G C G T A G A T T A A G G A T G A G A T G G T A T A G T T G A G T A A G T A G T T G G G A T T G T A G T T G G G G C G G T T G G T A T

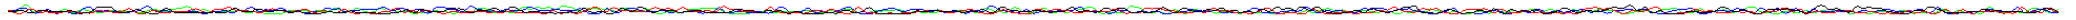

760 770 780 790 800 810 820  
A T G C T G A T A T G C A T A G G A C T A T A G G T T G C T G T A G T G G C T G T A G C T G A G A A T T A A T C G T T T A A A G A T G

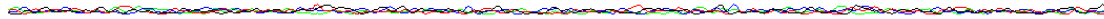

Supplement: s1 [file s1]
