# Supplementary material for: Feline Demodicosis Case Report—First Molecular Characterization of Demodex Mites in Romania
Source: MDPI journal article supplement (doi:10.3390/pathogens10111474), 2021-11-12
Supplement: s1 [file s1]

File: 260\_P2\_DEMODEX\_R.ab1 Run Ended: 2020/3/11 2:3:44 Signal G:201 A:781 C:940 T:944  
Sample: 260\_P2\_DEMODEX\_R Lane: 67 Base spacing: 12.756867 756 bases in 9464 scans Page 1 of 2

10 20 30 40 50 60 70 80 90 100 110 120  
GTA AG ATAA GAA CT T CAAA G A G TATT AT CCT GT TAACCC CG AAGTAT CTAT CCAAT CAACCTA CAAAAGTTCCT CATATAAAAAAT AAAT AT AAAAATAAAACTTTT CCCCCAAATAAAAAT TAAA

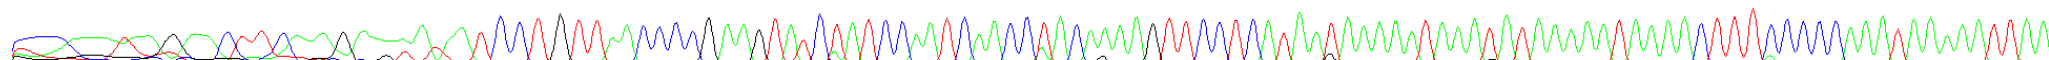

130 140 150 160 170 180 190 200 210 220 230 240  
ATACCTTT TTTCTAAAATAAAGATTTC GGGGTCTTCTC GTCTTTAGAAAT AATTCCAATTTTTT CAT GGAAAAAT TAAATTCA CCAATTAAAACATT CATAAAAAAAT CTT CATTAAT CCCCTCA

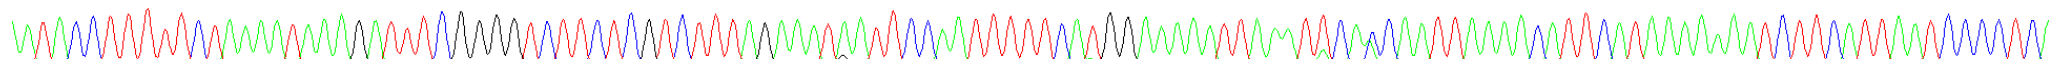

250 260 270 280 290 300 310 320 330 340 350 360 370  
TACAA GTTTCCAATAAAAAACAAAT GACTTCGCTACCTTAGCACATACAA T TAA GCGGGTGT GTTTT TGGTATTTG GTTGC GTTG TGGGG GTGTGGTTG T TGT TTTTGT T TGG GTTT GT

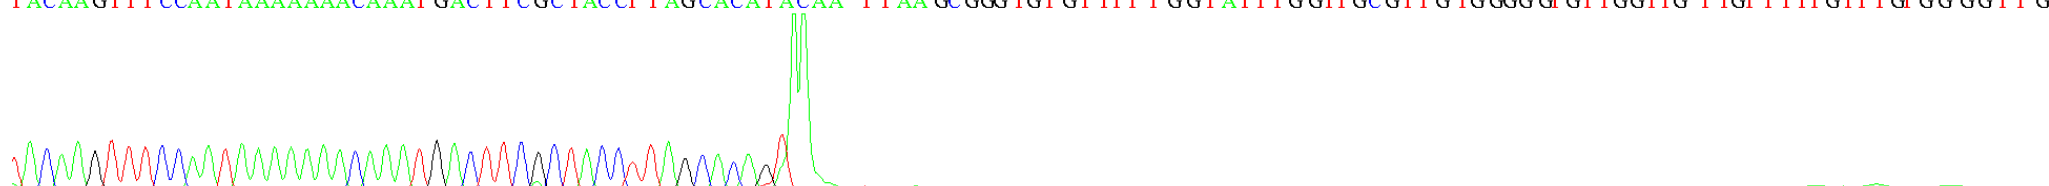

380 390 400 410 420 430 440 450 460 470 480 490  
GTTTTTGT T T T TTTGGT G GGTTGGTTTG TT GGTTGGT T TGTGG GTTGG TT T GGTTT GG TTGTGGGGGT GGTTTT GTT T GTTT GTGGT GG TTT TGGT GGGTTT TTT TTTGGT TTT TTGGT TTT TTGGT T G

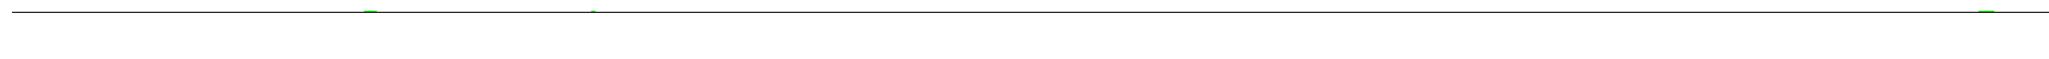

500 510 520 530 540 550 560 570 580 590 600  
G TGG GGG T G TG TGT G G G T GT G GTT T T TT TTT GG G TGTG GT TGG GGGTT GG TGGGGT TTGGTTGT T G TGT TTTT GTG GTGGT GT GT GG TGGGG TGTGT TGG T GGG GGG TGGT T G

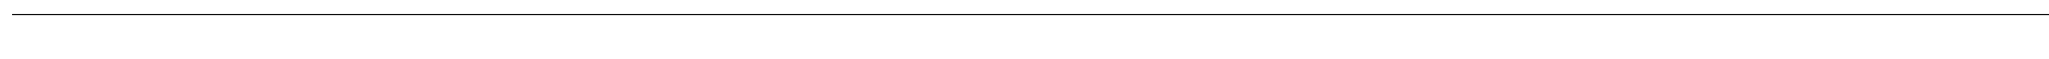

File: 260\_P2\_DEMODEX\_R.ab1

Run Ended: 2020/3/11 2:3:44

Signal G:201 A:781 C:940 T:944

Sample: 260\_P2\_DEMODEX\_R

Lane: 67

Base spacing: 12.756867

756 bases in 9464 scans

Page 2 of 2

610 620 630 640 650 660 670 680 690 700 710 720  
G TGG TT T G TGGG TG GGTT G GT TGGTTT GTGGG GGTTTGGTG T G TTGGG GTGTGGTG TGGG TTGTG TTGGGTTGTGTGG TTGG TTGGG G T TGGG TT G GG GGGGGTGTTTG

---

730 740 750  
TT T G TT GTGTGT TTT TT GT T TGGGTTGG GT T G

---
